# Supplementary material
Source: Springer Nature journal article supplement (https://www.springermedizin.de/resource/supplementary/13561_2012_34_MOESM2_ESM.pdf/9687296)
Supplement: MOESM2 [file 9687296]

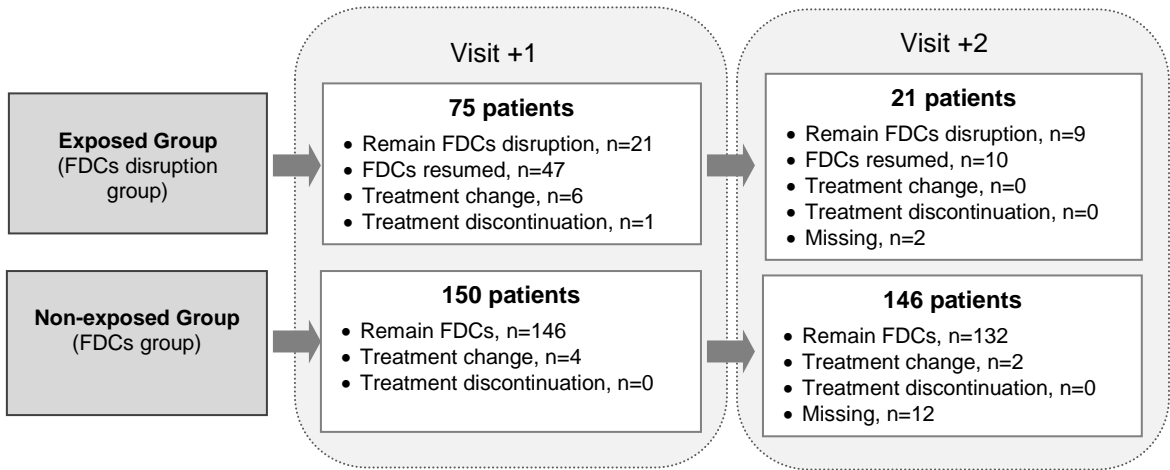

**Exposed Group**  
(FDCs disruption group)

Visit +1

**75 patients**

- Remain FDCs disruption, n=21
- FDCs resumed, n=47
- Treatment change, n=6
- Treatment discontinuation, n=1

Visit +2

**21 patients**

- Remain FDCs disruption, n=9
- FDCs resumed, n=10
- Treatment change, n=0
- Treatment discontinuation, n=0
- Missing, n=2

**Non-exposed Group**  
(FDCs group)

**150 patients**

- Remain FDCs, n=146
- Treatment change, n=4
- Treatment discontinuation, n=0

**146 patients**

- Remain FDCs, n=132
- Treatment change, n=2
- Treatment discontinuation, n=0
- Missing, n=12
